# Supplementary material for: Best clinical practice guidance for conscious sedation of children undergoing dental treatment: an EAPD policy document
Source: Springer Nature journal article supplement (doi:10.1007/s40368-021-00660-z), 2021-08-28
Supplement: MOESM1 [file 19608086]

**Best clinical practice guidance for conscious sedation of children undergoing dental treatment: an EAPD policy document**

**European Archives Paediatric Dentistry**

Paul Ashley 1

Prabhleen Anand 2

Kristofer Anderson 3

1 UCL Eastman Dental Institute, London

2 Royal National ENT and Eastman Dental Hospitals, London

3 Karolinska Institutet, Stockholm

Address for Correspondence

P Ashley

Paediatric Dentistry

UCL Eastman Dental Institute

Rockefeller Building

University St

London

WC1E 6DE

[p.ashley@ucl.ac.uk](mailto:p.ashley@ucl.ac.uk)

article title, journal name, author names; affiliation and e-mail address of the corresponding author.

# Supplement 1 PRISMA 2009 Flow Diagram<sup>1</sup>

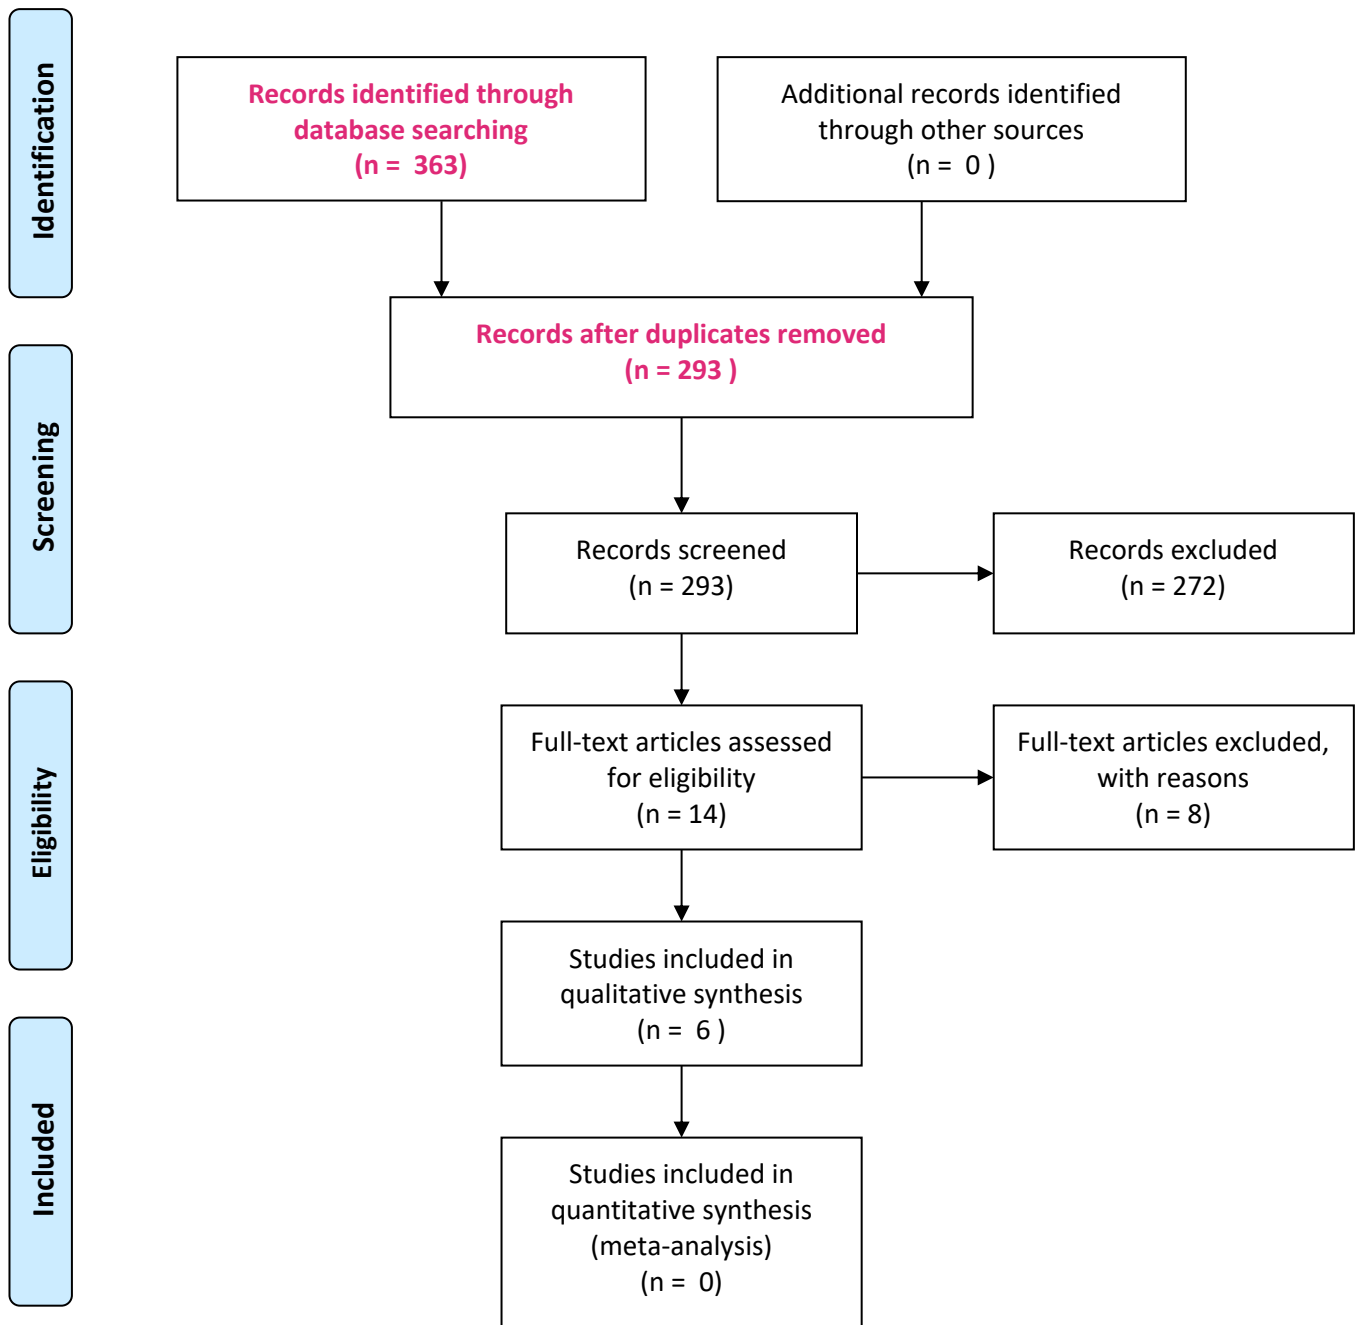

<sup>1</sup> From: Moher D, Liberati A, Tetzlaff J, Altman DG, The PRISMA Group (2009). Preferred Reporting Items for Systematic Reviews and Meta-Analyses: The PRISMA Statement. PLoS Med 6(6): e1000097. doi:10.1371/journal.pmed1000097. For more information, visit [www.prisma-statement.org](http://www.prisma-statement.org).

## Excluded studies

| Study         | Reason for exclusion                                                            |
|---------------|---------------------------------------------------------------------------------|
| Dixon 2020    | Not an RCT                                                                      |
| Hao 2017      | Surgical removal of impacted supernumerary teeth only                           |
| Khalil 2020   | Looking at effect of lignocaine on acceptance of midazolam. No data on sedation |
| Kharouba 2020 | Not an RCT                                                                      |
| Kip 2018      | General anaesthesia, induced with sevoflurane                                   |
| Lin 2019      | Not an RCT                                                                      |
| Mahdavi 2018  | Crossover                                                                       |

## Supplement 2 PRISMA 2009 Flow Diagram

### Characteristics of included studies from updated search

#### Hammadyeh 2019

##### *Methods*

Parallel design

Funding: University

Location: Syria

##### *Participants*

Inclusion criteria: negative and definitely negative criteria on Frankl scale

N= 40

Age range 2-6

Mean age (SD) in years, gender, weight (SD) in kg

Group 1 9.1 (0.9), 10 males and 10 females, 14.9 (9.1)

Group 2 8.9 (0.7), 9 males and 11 females, 15.2 (8.2)

##### *Interventions*

Group 1 (n=20): dexmedetomidine loading dose of 1 µg/kg over 10 min, followed by 0.2 µg/kg as continuous infusion until desired level of sedation achieved

Group 2 (n=20): ketamine hydrochloride 2 mg/kg + atropine 0.01 mg/kg

All IV

##### *Outcomes*

Ohio State University Behavioral Rating Scale

##### *Risk of Bias*

| Bias                                        | Authors' judgement | Support for Judgement                                                                                   |
|---------------------------------------------|--------------------|---------------------------------------------------------------------------------------------------------|
| Random sequence generation (selection bias) | Low risk           | Computer generated                                                                                      |
| Allocation concealment (selection bias)     | High risk          | No concealment                                                                                          |
| Blinding - Participant                      | High risk          | No blinding                                                                                             |
| Blinding - Operator/sedationist             | High risk          | No blinding                                                                                             |
| Blinding - Outcome assessor                 | Unclear risk       | Not described                                                                                           |
| Incomplete outcome assessment               | Low risk           | All randomised participants included in outcome assessment                                              |
| Free of selective reporting                 | Low risk           | All planned outcomes reported                                                                           |
| Free of other bias                          | Unclear            | No apparent differences between groups at baseline however mean age is stated as 9 but the range is 2-6 |

## Ilasrinivasan 2018

Parallel design

Funding: None

Location: India

### *Participants*

Inclusion criteria: negative (score 2) as on Frankl's behaviour rating scale

N= 30

Age range 3-10

Mean age (SD) in years, gender

Group 1 5.4 (1.81), 5 males and 10 females

Group 2 5.9 (1.67), 9 males and 6 females

### *Interventions*

Group 1 (n=15): midazolam (0.25 mg/kg) and ketamine (3mg/kg) Oral

Group 2 (n=15): nitrous oxide-oxygen up to 50% Inhalation

### *Outcomes*

Haupt

| Bias                                        | Authors' judgement | Support for Judgement                                               |
|---------------------------------------------|--------------------|---------------------------------------------------------------------|
| Random sequence generation (selection bias) | Unclear risk       | Not described                                                       |
| Allocation concealment (selection bias)     | High risk          | No concealment                                                      |
| Blinding - Participant                      | High risk          | No blinding                                                         |
| Blinding - Operator/sedationist             | High risk          | No blinding                                                         |
| Blinding - Outcome assessor                 | High risk          | No blinding                                                         |
| Incomplete outcome assessment               | Low risk           | All randomised participants included in outcome assessment          |
| Free of selective reporting                 | Low risk           | All planned outcomes reported                                       |
| Free of other bias                          | Unclear risk       | Difference in gender balance at baseline (not statistically tested) |

## Jaikaria 2018

Parallel design

Funding: None

Location: India

### *Participants*

Inclusion criteria: negative as on Frankl's behaviour rating scale

N= 34

Age range 3-9

Mean age (SD) in years, weight (SD) in kg

4.59 (1.20), 15.26 (2.41)

### *Interventions*

Group 1: 0.3 mg/kg midazolam + 5 mg/kg ketamine

Group 2: 2 ug/kg dexmedetomidine + 3 ug/kg fentanyl

Group 3: 2 ug/kg dexmedetomidine + 5 mg/kg of ketamine

All Oral

### *Outcomes*

Modified from Observer Assessment of Alertness and Sedation

| Bias                                        | Authors' judgement | Support for Judgement                                      |
|---------------------------------------------|--------------------|------------------------------------------------------------|
| Random sequence generation (selection bias) | Low risk           | Envelope                                                   |
| Allocation concealment (selection bias)     | Low risk           | Described clearly                                          |
| Blinding - Participant                      | Low risk           | Blinded                                                    |
| Blinding - Operator/sedationist             | Low risk           | Dentist blinded                                            |
| Blinding - Outcome assessor                 | Low risk           | Observer blinded                                           |
| Incomplete outcome assessment               | Low risk           | All randomised participants included in outcome assessment |
| Free of selective reporting                 | Low risk           | All planned outcomes reported                              |
| Free of other bias                          | Low risk           | No apparent differences between groups at baseline         |

## Patel 2018

Parallel design

Funding: None

Location: India

### *Participants*

Inclusion criteria: basic behavior modification techniques were unsuccessful

N= 44

Age range 4-9

No further information on demographics provided

### *Interventions*

Group 1: 2 ug/kg dexmedetomidine

Group 2: 2.5 ug/kg dexmedetomidine

All intranasal

Group 3: 4 ug/kg dexmedetomidine

Group 4: 5 ug/kg dexmedetomidine

All Oral

### *Outcomes*

Ohio State University Behavioral Rating Scale

| Bias                                        | Authors' judgement | Support for Judgement                                      |
|---------------------------------------------|--------------------|------------------------------------------------------------|
| Random sequence generation (selection bias) | High risk          | No detail provided                                         |
| Allocation concealment (selection bias)     | High risk          | No concealment                                             |
| Blinding - Participant                      | High risk          | Not blinded                                                |
| Blinding - Operator/sedationist             | High risk          | Not blinded                                                |
| Blinding - Outcome assessor                 | High risk          | Not blinded                                                |
| Incomplete outcome assessment               | Low risk           | All randomised participants included in outcome assessment |
| Free of selective reporting                 | Low risk           | All planned outcomes reported                              |
| Free of other bias                          | Unclear risk       | No information provided                                    |

## Sado-Filho 2019

Parallel design

Funding: Conselho Nacional de Desenvolvimento Científico e Tecnológico

Location: Brazil

### Participants

Inclusion criteria: uncooperative behaviour confirmed during dental exam

N= 84

Age range < 7

Mean age (range) in months, gender, weight (range) in kg

Group 1 43.5 (33 – 52.3), 14 males and 14 females, 15.7 (13.5=17.5)

Group 2 38 (33.3 - 48), 15 males and 13 females, 14.5 (13 – 17.4)

Group 3 42.5 (35 – 47.5), 14 males and 14 females, 15.4 (14.2 – 17.3)

### Interventions

Group 1 (n=28): 4.0 mg/kg ketamine + 0.2 mg/kg midazolam Intranasal

Group 2 (n=28): 4.0 mg/kg ketamine + 0.5 mg/kg midazolam Oral

Group 3 (n=28): 1 mg/kg midazolam Oral

### Outcomes

Ohio State University Behavioral Rating Scale

| Bias                                        | Authors' judgement | Support for Judgement                                      |
|---------------------------------------------|--------------------|------------------------------------------------------------|
| Random sequence generation (selection bias) | Low risk           | Online                                                     |
| Allocation concealment (selection bias)     | Low risk           | Carried out by anaesthesiologist using envelopes           |
| Blinding - Participant                      | Low risk           | Blinded                                                    |
| Blinding - Operator/sedationist             | Low risk           | Blinded                                                    |
| Blinding - Outcome assessor                 | Low risk           | Blinded and multiple outcome assessors used                |
| Incomplete outcome assessment               | Low risk           | All randomised participants included in outcome assessment |
| Free of selective reporting                 | Low risk           | All planned outcomes reported                              |
| Free of other bias                          | Low risk           | No apparent differences between groups at baseline         |



## Yalcin 2018

Parallel design  
Funding: None  
Location: Turkey

### *Participants*

Inclusion criteria: failed to start dental treatment despite behavioral guidance techniques

N= 75

Age range 6-12

No further information on demographics provided

### *Interventions*

Group 1 (n=25): 1 mg/kg bolus dose Ketamine followed by 50-60 µg/ kg/min continuous infusion

Group 2 (n=25): 2 mg/kg bolus dose Propofol followed by 70-90 µg/kg/min continuous infusion

Group 3 (n=25): 0.6 mg/kg bolus dose Propofol/Ketamine (1:1 mix) followed by 40-60 µg/kg/min continuous infusion

All IV

### *Outcomes*

BIS monitoring, Observer's Assessment of Alertness/Sedation (OAAS) and Ramsay Sedation Scales (RSS) scores.

| Bias                                        | Authors' judgement | Support for Judgement                                      |
|---------------------------------------------|--------------------|------------------------------------------------------------|
| Random sequence generation (selection bias) | Low risk           | Closed envelope                                            |
| Allocation concealment (selection bias)     | Unclear            | Not described                                              |
| Blinding - Participant                      | Low risk           | Blinded                                                    |
| Blinding - Operator/sedationist             | Low risk           | Blinded                                                    |
| Blinding - Outcome assessor                 | Low risk           | Blinded and multiple outcome assessors used                |
| Incomplete outcome assessment               | Low risk           | All randomised participants included in outcome assessment |
| Free of selective reporting                 | Low risk           | All planned outcomes reported                              |
| Free of other bias                          | Low risk           | No differences reported between groups at baseline         |

### Supplement 3 Frequency of studies in which drug regimens were tested

| Drug regimen                        | Study                                              |
|-------------------------------------|----------------------------------------------------|
| Dexmedetomidine                     | Hammadyeh 2019, Patel 2018                         |
| Dexmedetomidine and fentanyl        | Jaikaria 2018                                      |
| Dexmedetomidine and midazolam       | Jaikaria 2018                                      |
| Ketamine                            | Yalcin 2018                                        |
| Ketamine and atropine               | Hammadyeh 2019                                     |
| Ketamine and propofol               | Yalcin 2018                                        |
| Midazolam (oral)                    | Sado-Filho 2019                                    |
| Midazolam and ketamine (intranasal) | Sado-Filho 2019                                    |
| Midazolam and ketamine (oral)       | Ilasrinivasan 2018, Jaikaria 2018, Sado-Filho 2019 |
| Nitrous oxide                       | Ilasrinivasan 2018                                 |
| Propofol                            | Yalcin 2018                                        |

**Supplement 4 Risk of Bias assessments of included studies from updated search**

|                           | Random sequence generation | Allocation concealment | Blinding-Participant | Blinding – operator | Blinding – outcome assessor | Incomplete outcome assessment | Free of selective reporting | Free of other bias |
|---------------------------|----------------------------|------------------------|----------------------|---------------------|-----------------------------|-------------------------------|-----------------------------|--------------------|
| <b>Hammadyeh 2019</b>     | +                          | -                      | -                    | -                   | ?                           | +                             | +                           | ?                  |
| <b>Ilasrinivasan 2018</b> | ?                          | -                      | -                    | -                   | -                           | +                             | +                           | ?                  |
| <b>Jaikaria 2018</b>      | +                          | +                      | +                    | +                   | +                           | +                             | +                           | +                  |
| <b>Patel 2018</b>         | -                          | -                      | -                    | -                   | -                           | +                             | +                           | ?                  |
| <b>Sado-Filho 2019</b>    | +                          | +                      | +                    | +                   | +                           | +                             | +                           | +                  |
| <b>Yalcin 2018</b>        | +                          | ?                      | +                    | +                   | +                           | +                             | +                           | +                  |

**Supplement 5 Behaviour and sedation rating scales from the updated search.**

| Rating scale                                                | Study                                       |
|-------------------------------------------------------------|---------------------------------------------|
| Houpt                                                       | Ilasrinivasan 2018                          |
| Modified from Observer Assessment of Alertness and Sedation | Jaikaria 2018                               |
| Observer Assessment of Alertness and Sedation               | Yalcin 2018                                 |
| Ohio State University Behavioral Rating Scale               | Hammadyeh 2019, Patel 2018, Sado-Filho 2019 |
| Ramsay Sedation Scale                                       | Yalcin 2018                                 |

## Supplement 6 Dosage and drug comparison studies

### Dosage study outcomes

Dexmedetomidine vs

| Study ID   | Demographics                                                              | Groups                                                                                                                                                                           | Outcome measures                               | Results                                                                                                                                                                                                                      | Treatment completed                                                       |
|------------|---------------------------------------------------------------------------|----------------------------------------------------------------------------------------------------------------------------------------------------------------------------------|------------------------------------------------|------------------------------------------------------------------------------------------------------------------------------------------------------------------------------------------------------------------------------|---------------------------------------------------------------------------|
| Patel 2018 | N= 44<br>Age range 4-9<br>No further information on demographics provided | Group 1: 2 ug/kg dexmedetomidine<br>Group 2: 2.5 ug/kg dexmedetomidine<br>All intranasal<br><br>Group 3: 4 ug/kg dexmedetomidine<br>Group 4: 5 ug/kg dexmedetomidine<br>All Oral | Ohio State University Behavioural Rating Scale | Significantly better behaviour in Groups 1 and 2 compared to 3 and 4<br><br>Data reported as mean (SD)<br><br>Adverse effects: no serious side effects reported<br><br>Monitoring: cardiovascular and respiratory monitoring | Successful completion<br>Group 1 73%,<br>Group 2 45%, 0 in Groups 3 and 4 |



## Comparison study outcomes

### Dexmedetomidine vs

| Study ID       | Demographics                                                                                                                                                                                   | Groups                                                                                                                                                                                                                                    | Outcome measures                              | Results                                                                                                                                                                                                                  | Treatment completed                  |
|----------------|------------------------------------------------------------------------------------------------------------------------------------------------------------------------------------------------|-------------------------------------------------------------------------------------------------------------------------------------------------------------------------------------------------------------------------------------------|-----------------------------------------------|--------------------------------------------------------------------------------------------------------------------------------------------------------------------------------------------------------------------------|--------------------------------------|
| Hammadyeh 2019 | N= 40<br>Age range 2-6<br>Mean age (SD) in years, gender, weight (SD) in kg<br>Group 1 9.1 (0.9), 10 males and 10 females, 14.9 (9.1)<br>Group 2 8.9 (0.7), 9 males and 11 females, 15.2 (8.2) | Group 1 (n=20): dexmedetomidine loading dose of 1 µg/kg over 10 min, followed by 0.2 µg/kg as continuous infusion until desired level of sedation achieved<br>Group 2 (n=20): ketamine hydrochloride 2 mg/kg + atropine 0.01 mg/kg All IV | Ohio State University Behavioral Rating Scale | Significantly better behaviour in dexmedetomidine group (p=0.03)<br><br>Data reported as mean (SD)<br><br>Adverse effects: no serious side effects reported<br><br>Monitoring: cardiovascular and respiratory monitoring | All participants completed treatment |

### Ketamine vs

| Study ID    | Demographics            | Groups                                                  | Outcome measures                           | Results                            | Treatment completed |
|-------------|-------------------------|---------------------------------------------------------|--------------------------------------------|------------------------------------|---------------------|
| Yalcin 2018 | N= 75<br>Age range 6-12 | Group 1 (n=25): 1 mg/kg bolus dose<br>Ketamine followed | BIS monitoring<br>Observer's Assessment of | Mean BIS scores at all time points | Not reported        |

|  |                                                        |                                                                                                                                                                                                                                                                                            |                                                                                                                                  |                                                                                                                                                                                                                                                                                                                                                                                                                                                 |  |
|--|--------------------------------------------------------|--------------------------------------------------------------------------------------------------------------------------------------------------------------------------------------------------------------------------------------------------------------------------------------------|----------------------------------------------------------------------------------------------------------------------------------|-------------------------------------------------------------------------------------------------------------------------------------------------------------------------------------------------------------------------------------------------------------------------------------------------------------------------------------------------------------------------------------------------------------------------------------------------|--|
|  | <p>No further information on demographics provided</p> | <p>by 50-60 µg/kg/min continuous infusion<br/> Group 2 (n=25): 2 mg/kg bolus dose<br/> Propofol followed by 70-90 µg/kg/min continuous infusion<br/> Group 3 (n=25): 0.6 mg/kg bolus dose<br/> Propofol/Ketamine (1:1 mix) followed by 40-60 µg/kg/min continuous infusion<br/> All IV</p> | <p>Alertness/Sedation (OAAS)<br/> Ramsay Sedation Scales (RSS) scores<br/> Post-op anxiety as measured by MCDASf and CFSS DS</p> | <p>after drug administration in Group 2 and 2 were significantly lower than those in Group 1 (<math>p &lt; 0.0001</math>, all time points)</p> <p>Mean Ramsay Sedation Scale (RSS) scores in Group 2 at all time points were significantly lower than those in Group 1 (<math>p &lt; 0.0001</math>; <math>p = 0.001</math>; <math>p &lt; 0.0001</math>; <math>p &lt; 0.0001</math>) while in Group 3 mean RSS scores at 10th, 15th and 20th</p> |  |
|--|--------------------------------------------------------|--------------------------------------------------------------------------------------------------------------------------------------------------------------------------------------------------------------------------------------------------------------------------------------------|----------------------------------------------------------------------------------------------------------------------------------|-------------------------------------------------------------------------------------------------------------------------------------------------------------------------------------------------------------------------------------------------------------------------------------------------------------------------------------------------------------------------------------------------------------------------------------------------|--|



|  |  |  |  |                                                                                                                                                                                                                                                                                                                                                                                                                                                                                                                                |  |
|--|--|--|--|--------------------------------------------------------------------------------------------------------------------------------------------------------------------------------------------------------------------------------------------------------------------------------------------------------------------------------------------------------------------------------------------------------------------------------------------------------------------------------------------------------------------------------|--|
|  |  |  |  | <p>minutes were significantly lower than those in Group 1 (<math>p = 0.003</math>; <math>p = 0.002</math>; <math>p = 0.007</math>).</p> <p>Mean OAAS scores in Group P at all time points – except 5th minutes- and in Group KP –except 5th and 10th minutes- were significantly higher than those in Group K (<math>p &lt; 0.0001</math>; <math>p = 0.002</math>; <math>p &lt; 0.0001</math>; <math>p &lt; 0.0001</math> and <math>p = 0.016</math>; <math>p &lt; 0.0001</math>; <math>p &lt; 0.0001</math> respectively)</p> |  |
|--|--|--|--|--------------------------------------------------------------------------------------------------------------------------------------------------------------------------------------------------------------------------------------------------------------------------------------------------------------------------------------------------------------------------------------------------------------------------------------------------------------------------------------------------------------------------------|--|

|  |  |  |  |                                                                                                                                                                                                                                                                                                                                                 |  |
|--|--|--|--|-------------------------------------------------------------------------------------------------------------------------------------------------------------------------------------------------------------------------------------------------------------------------------------------------------------------------------------------------|--|
|  |  |  |  | <p>Mean CFSS-DS and MCDASf scores after dental treatment in Group 2 and 3 significantly lower than that in Group 1 (p = 0.001, p = 0.021 and p = 0.003; p = 0.033 respectively)<br/>Medians and means presented graphically</p> <p>Adverse effects:<br/>Higher in Group 1 compared to groups 2 and 3</p> <p>Monitoring:<br/>blood pressure,</p> |  |
|--|--|--|--|-------------------------------------------------------------------------------------------------------------------------------------------------------------------------------------------------------------------------------------------------------------------------------------------------------------------------------------------------|--|

|  |  |  |  |                                     |  |
|--|--|--|--|-------------------------------------|--|
|  |  |  |  | heart rate,<br>oxygen<br>saturation |  |
|--|--|--|--|-------------------------------------|--|

Midazolam and ketamine vs

| Study ID           | Demographics                                                                                                                                         | Groups                                                                                                                         | Outcome measures       | Results                                                                                                                                                                                                                    | Treatment completed                                                     |
|--------------------|------------------------------------------------------------------------------------------------------------------------------------------------------|--------------------------------------------------------------------------------------------------------------------------------|------------------------|----------------------------------------------------------------------------------------------------------------------------------------------------------------------------------------------------------------------------|-------------------------------------------------------------------------|
| Ilasrinivasan 2018 | N= 30<br>Age range 3-10<br>Mean age (SD) in years, gender<br>Group 1 5.4 (1.81), 5 males and 10 females<br>Group 2 5.9 (1.67), 9 males and 6 females | Group 1 (n=15): midazolam (0.25 mg/kg) and ketamine (3mg/kg) Oral<br>Group 2 (n=15): nitrous oxide-oxygen up to 50% Inhalation | Houpt                  | No statistical difference in MOAAS<br><br>Data reported as percentages<br><br>Adverse effects: hallucination and oversleep the following night in group 1<br><br>Monitoring: blood pressure, heart rate, oxygen saturation | Completed in 80% group 1 and 73% group 2. Not statistically significant |
| Jaikaria 2018      | N= 34<br>Age range 3-9                                                                                                                               | Group 1: 0.3 mg/kg midazolam                                                                                                   | Modified from Observer | No statistical difference in MOAAS                                                                                                                                                                                         | All participants                                                        |

|                        |                                                                                                                                                                        |                                                                                                                                                                                         |                                                      |                                                                                                                                                                                             |                                                                                       |
|------------------------|------------------------------------------------------------------------------------------------------------------------------------------------------------------------|-----------------------------------------------------------------------------------------------------------------------------------------------------------------------------------------|------------------------------------------------------|---------------------------------------------------------------------------------------------------------------------------------------------------------------------------------------------|---------------------------------------------------------------------------------------|
|                        | <p>Mean age (SD) in years, weight (SD) in kg<br/>4.59 (1.20),<br/>15.26 (2.41)</p>                                                                                     | <p>+ 5 mg/kg ketamine<br/>Group 2: 2 ug/kg dexmedetomidine + 3 ug/kg fentanyl<br/>Group 3: 2 ug/kg dexmedetomidine + 5 mg/kg of ketamine<br/>All Oral</p>                               | <p>Assessment of Alertness and Sedation</p>          | <p>Mean score of outcome reported</p> <p>Adverse effects: Post-operative nausea and vomiting reported in all groups</p> <p>Monitoring: blood pressure, heart rate, oxygen saturation</p>    | <p>completed treatment</p>                                                            |
| <p>Sado-Filho 2019</p> | <p>N= 84<br/>Age range &lt; 7<br/>Mean age (range) in months, gender, weight (range) in kg<br/>Group 1 43.5 (33 – 52.3), 14 males and 14 females, 15.7 (13.5=17.5)</p> | <p>Group 1 (n=28): 4.0 mg/kg ketamine + 0.2 mg/kg midazolam Intranasal<br/>Group 2 (n=28): 4.0 mg/kg ketamine + 0.5 mg/kg midazolam Oral<br/>Group 3 (n=28): 1 mg/kg midazolam Oral</p> | <p>Ohio State University Behavioral Rating Scale</p> | <p>No difference in groups as assessed by dichotomous variable 'quiet behavior for at least 60% of the session length' was:<br/>Group 1 50.0%, Group 2 46.4%, Group 3 32.1% (P = 0.360)</p> | <p>Treatment completed 92.9%<br/>Group 1, 89.3%<br/>Group 2 and 85.7%<br/>Group 3</p> |

|  |                                                                                                                                                                                        |  |  |                                                                                                                                                                                                                     |  |
|--|----------------------------------------------------------------------------------------------------------------------------------------------------------------------------------------|--|--|---------------------------------------------------------------------------------------------------------------------------------------------------------------------------------------------------------------------|--|
|  | <p>Group 2 38<br/>(33.3 - 48), 15<br/>males and 13<br/>females, 14.5<br/>(13 - 17.4)<br/>Group 3 42.5<br/>(35 - 47.5),<br/>14 males and<br/>14 females,<br/>15.4 (14.2 -<br/>17.3)</p> |  |  | <p>Medians and<br/>means<br/>presented<br/>graphically</p> <p>Adverse<br/>effects:<br/>Vomiting<br/>reported in all<br/>groups</p> <p>Monitoring:<br/>blood<br/>pressure, heart<br/>rate, oxygen<br/>saturation</p> |  |
|--|----------------------------------------------------------------------------------------------------------------------------------------------------------------------------------------|--|--|---------------------------------------------------------------------------------------------------------------------------------------------------------------------------------------------------------------------|--|
